# Supplementary material for: High-Risk International Clones of Carbapenem-Nonsusceptible Pseudomonas aeruginosa Endemic to Indonesian Intensive Care Units: Impact of a Multifaceted Infection Control Intervention Analyzed at the Genomic Level
Source: PubMed Central journal article supplement (PMC6851282; doi:10.1128/mbio.02384-19), 2019-11-12
Supplement: mBio.02384-19-sf001.pdf [file mBio.02384-19-sf001.pdf]

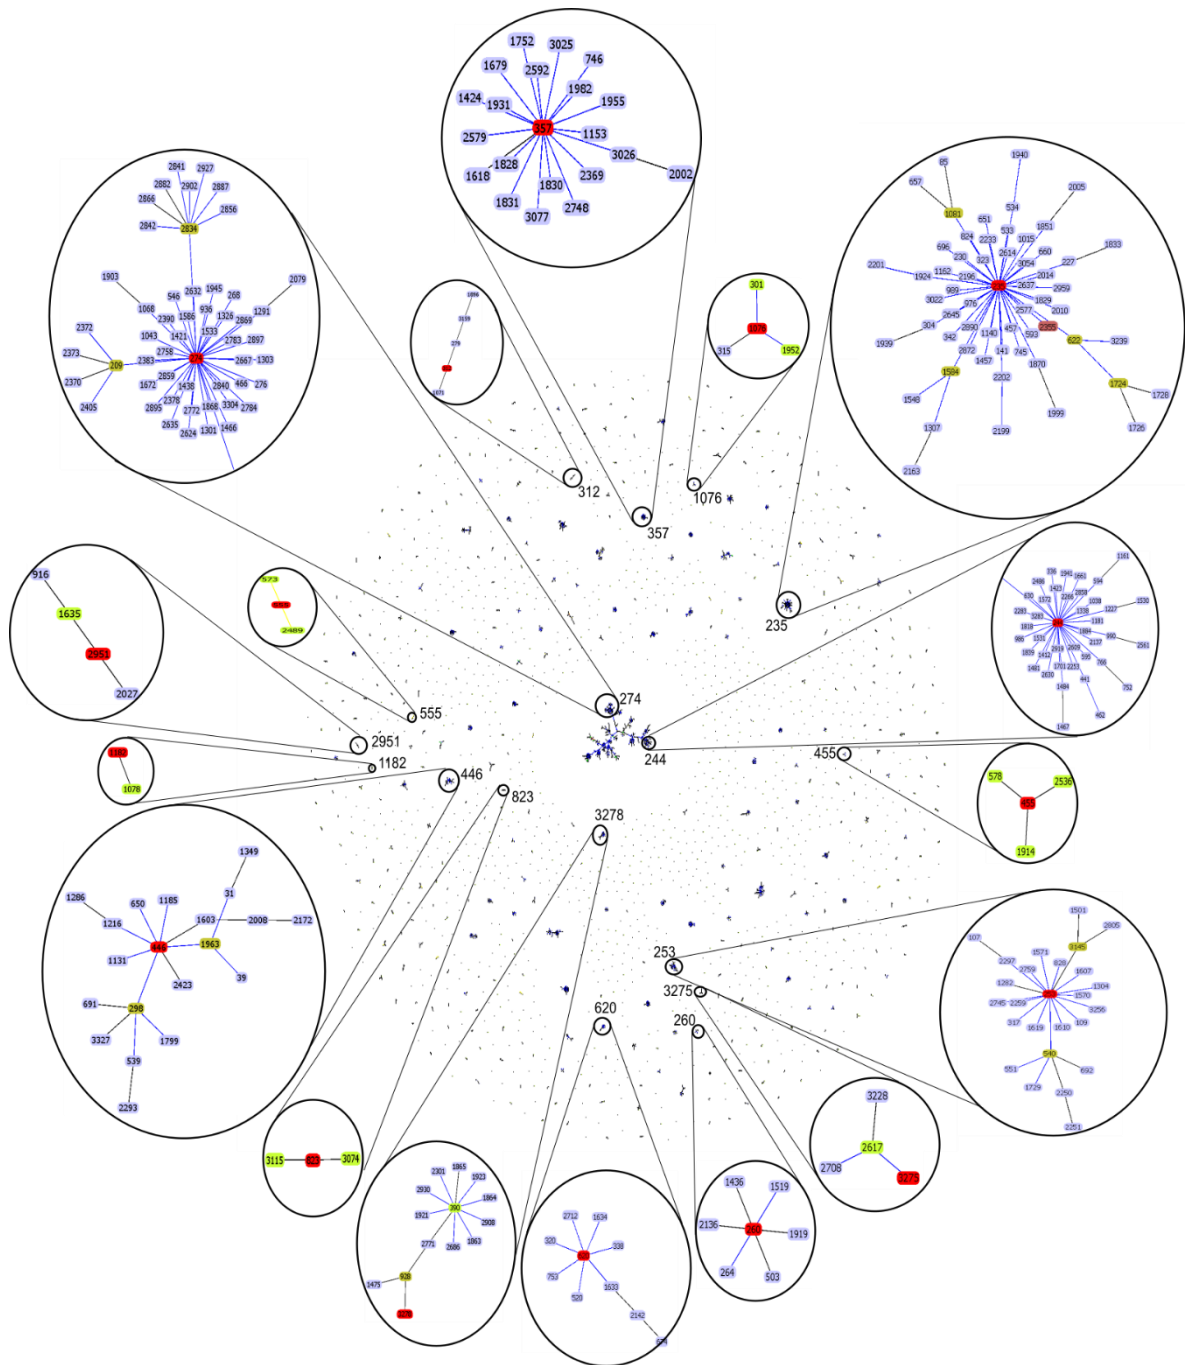

**Figure S1.** goeBURST of the 3321 sequence types listed in the *Pseudomonas aeruginosa* PubMLST database (August 2019). Blue points represent sequence types (STs); lines connect single-locus variants (SLVs). Red boxes within the circles are the STs found in this study, light green boxes represent the clonal complex group founder, while dark green boxes the sub-group founder. ST1189 and ST3277 are singletons.
